# Supplementary material for: Accuracy of CT Colonography for Detection of Large Adenomas and Cancers
Source: Atypon-hosted journal article supplement (doi:10.1056/nejmoa0800996), 2008-09-18

## Supplementary Appendix

This appendix has been provided by the authors to give readers additional information about their work.

Supplement to: Johnson CD, Chen M-H, Toledano AY, et al. Accuracy of CT colonography for detection of large adenomas and cancers. *N Engl J Med* 2008;359:1207-17.

## **Appendix 1. CT Colonography Technique**

### **Stool Tagging** (24 hours prior to laxatives)

16 grams Barium sulfate (Tagitol V, Lake Success, NY) in three divided doses 4-6 hours apart

### **Bowel cleansing** (ordered at the preference of the referring physician) Administered day prior to examination

Polyethylene glycol electrolyte lavage (generally 4 liters)

Or

Magnesium Citrate (generally 300 ml)

Or

Phosphosoda (45-90 ml)

Plus (added to any of the three regimens above)

Bisacodyl tablets (generally 10 mg)

### **Fluid Tagging (taken orally the evening prior to the examination)**

60 ml water-soluble iodinated oral contrast material (diatrizoate meglumine and diatrizoate sodium, Gastroview, Mallinckrodt Imaging, ST. Louis, MO)

### **Glucagon** (administered 7-15 minutes prior to CT acquisition unless contraindicated or refused by patient)

1 milligram subcutaneously.

## Appendix 2. Patient accrual flowchart

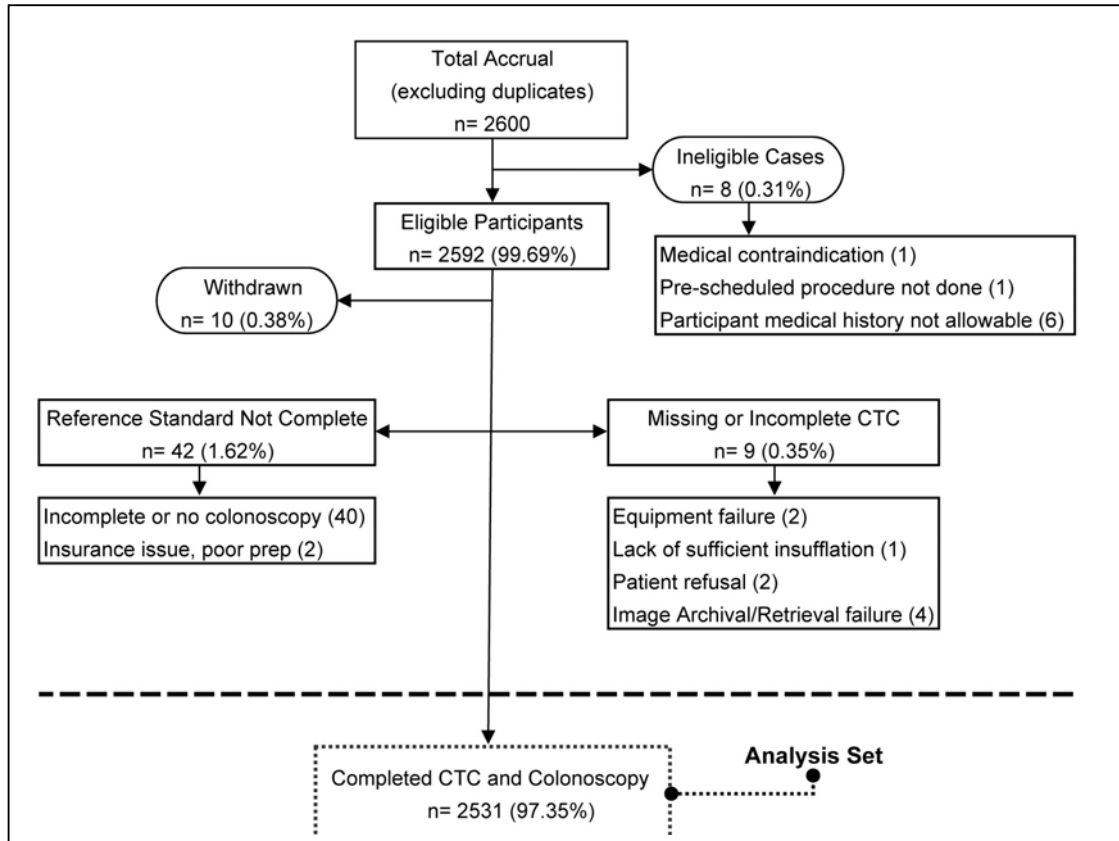

Supplement: nejm_johnson_1207sa1.pdf [file nejm_johnson_1207sa1.pdf]
